# Supplementary material
Source: Springer Nature journal article supplement (https://www.springermedizin.de/resource/supplementary/12969_2013_1277_MOESM1_ESM.pdf/9589208)
Supplement: MOESM1 [file 9589208]

## The pGALS musculoskeletal screen

### Screening questions

- Do you (or does your child) have any pain or stiffness in your (their) joints, muscles or back?
- Do you (or does your child) have any difficulty getting yourself (him/herself) dressed without any help?
- Do you (or does your child) have any problem going up and down stairs?

| FIGURE                                                                           | SCREENING MANOEUVRES<br><small>(Note the manoeuvres in bold are additional to those in adult GALS)</small> | WHAT IS BEING ASSESSED?                                                                                                                                                                                                                                                     |
|----------------------------------------------------------------------------------|------------------------------------------------------------------------------------------------------------|-----------------------------------------------------------------------------------------------------------------------------------------------------------------------------------------------------------------------------------------------------------------------------|
|   | Observe the child standing (from front, back and sides)                                                    | <ul style="list-style-type: none"> <li>• Posture and habitus</li> <li>• Skin rashes – e.g. psoriasis</li> <li>• Deformity – e.g. leg length inequality, leg alignment (valgus, varus at the knee or ankle), scoliosis, joint swelling, muscle wasting, flat feet</li> </ul> |
|   | Observe the child walking and<br><b>'Walk on your heels'</b> and<br><b>'Walk on your tiptoes'</b>          | <ul style="list-style-type: none"> <li>• Ankles, subtalar, midtarsal and small joints of feet and toes</li> <li>• Foot posture (note if presence of normal longitudinal arches of feet when on tiptoes)</li> </ul>                                                          |
|   | 'Hold your hands out straight in front of you'                                                             | <ul style="list-style-type: none"> <li>• Forward flexion of shoulders</li> <li>• Elbow extension</li> <li>• Wrist extension</li> <li>• Extension of small joints of fingers</li> </ul>                                                                                      |
|   | 'Turn your hands over and make a fist'                                                                     | <ul style="list-style-type: none"> <li>• Wrist supination</li> <li>• Elbow supination</li> <li>• Flexion of small joints of fingers</li> </ul>                                                                                                                              |
|  | 'Pinch your index finger and thumb together'                                                               | <ul style="list-style-type: none"> <li>• Manual dexterity</li> <li>• Coordination of small joints of index finger and thumb and functional key grip</li> </ul>                                                                                                              |

| FIGURE                                                                             | SCREENING MANOEUVRES                                                                               | WHAT IS BEING ASSESSED?                                                                                                                                |
|------------------------------------------------------------------------------------|----------------------------------------------------------------------------------------------------|--------------------------------------------------------------------------------------------------------------------------------------------------------|
|    | 'Touch the tips of your fingers'                                                                   | <ul style="list-style-type: none"> <li>• Manual dexterity</li> <li>• Coordination of small joints of fingers and thumbs</li> </ul>                     |
|   | Squeeze the metacarpophalangeal joints for tenderness                                              | <ul style="list-style-type: none"> <li>• Metacarpophalangeal joints</li> </ul>                                                                         |
|   | <b>'Put your hands together palm to palm'</b> and<br><b>'Put your hands together back to back'</b> | <ul style="list-style-type: none"> <li>• Extension of small joints of fingers</li> <li>• Wrist extension</li> <li>• Elbow flexion</li> </ul>           |
|   | <b>'Reach up, "touch the sky"'</b> and<br><b>'Look at the ceiling'</b>                             | <ul style="list-style-type: none"> <li>• Elbow extension</li> <li>• Wrist extension</li> <li>• Shoulder abduction</li> <li>• Neck extension</li> </ul> |
|  | 'Put your hands behind your neck'                                                                  | <ul style="list-style-type: none"> <li>• Shoulder abduction</li> <li>• External rotation of shoulders</li> <li>• Elbow flexion</li> </ul>              |

| FIGURE                                                                               | SCREENING MANOEUVRES                                                       | WHAT IS BEING ASSESSED?                                                                                                |
|--------------------------------------------------------------------------------------|----------------------------------------------------------------------------|------------------------------------------------------------------------------------------------------------------------|
| 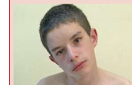   | 'Try and touch your shoulder with your ear'                                | <ul style="list-style-type: none"> <li>• Cervical spine lateral flexion</li> </ul>                                     |
|   | <b>'Open wide and put three (child's own) fingers in your mouth'</b>       | <ul style="list-style-type: none"> <li>• Temporomandibular joints (and check for deviation of jaw movement)</li> </ul> |
|   | Feel for effusion at the knee (patella tap, or cross-fluctuation)          | <ul style="list-style-type: none"> <li>• Knee effusion (small effusion may be missed by patella tap alone)</li> </ul>  |
|   | Active movement of knees (flexion and extension) and feel for crepitus     | <ul style="list-style-type: none"> <li>• Knee flexion</li> <li>• Knee extension</li> </ul>                             |
|   | Passive movement of hip (knee flexed to 90°, and internal rotation of hip) | <ul style="list-style-type: none"> <li>• Hip flexion and internal rotation</li> </ul>                                  |
|  | 'Bend forwards and touch your toes?'                                       | <ul style="list-style-type: none"> <li>• Forward flexion of thoraco-lumbar spine (and check for scoliosis)</li> </ul>  |
